# Supplementary material for: Thermal conversion of an anion-exchange resin: a new catalytic-graphitization route to prepare porous carbons with a high graphitization degree for supercapacitors
Source: Royal Society of Chemistry journal article supplement (doi:10.1039/c6ra22625f), 2016-01-01
Supplement: c6ra22625f1.pdf [file c6ra22625f1.pdf]

**Thermal conversion of anion-exchange resin: a new  
catalytic-graphitization route to prepare porous carbons  
with high graphitization degree for supercapacitors**

*Haifeng Xu \**

*School of Mechanical and Electronic Engineering, Suzhou University, Suzhou 23400, PR China*

---

\* Corresponding author. E-mail: [xuhaifeng@ahsztc.edu.cn](mailto:xuhaifeng@ahsztc.edu.cn)

## Results and discussion

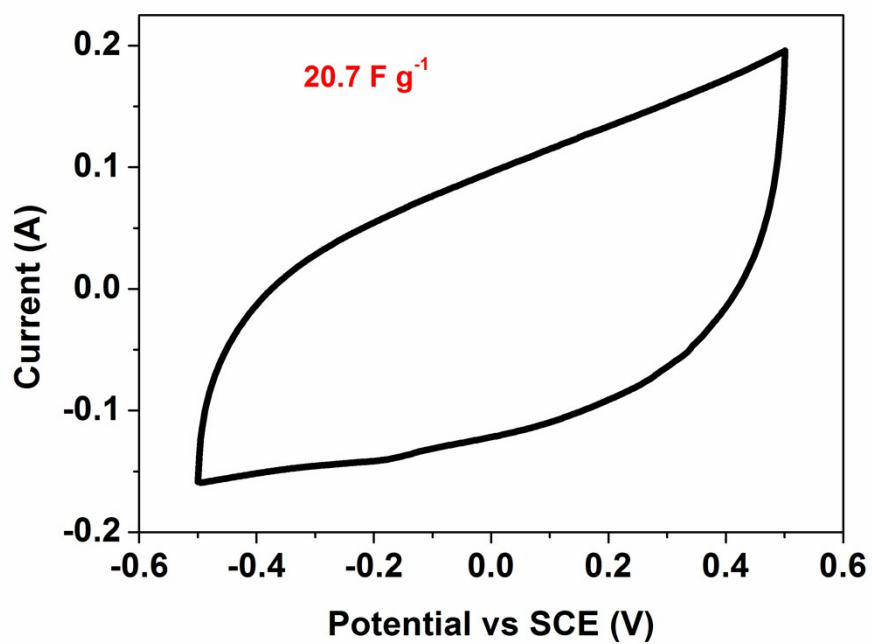

Fig. S1 CV curve of graphite paper at 5 mV s<sup>-1</sup>.
